# Supplementary material for: Epigenetic inactivation of TCF2 in ovarian cancer and various cancer cell lines
Source: PubMed Central journal article supplement (PMC2361363; doi:10.1038/sj.bjc.6602984), 2006-02-14
Supplement: 94-6602984x1.pdf [file 94-6602984x1.pdf]

# Supplementary information for reviewers

## Figure 1

| Primers for mutation analysis of TCF2 |                                                                          |                            |                            |
|---------------------------------------|--------------------------------------------------------------------------|----------------------------|----------------------------|
|                                       | Sequences                                                                | Annealing temperature (°C) | Sizes of PCR products (bp) |
| Exon 1A                               | E: 5'-GGTGGAGGGGTTCTGGATTG-3'<br>R: 5'-GGCCGTTGGTGAGAGTATGGAAG-3'        | 55                         | 310                        |
| Exon 1B                               | E: 5'-GGCCTTGGAGGAGTTGCTGCCATC-3'<br>R: 5'-GCTCCAGGGGTTCCGGTGGGTC-3'     | 60                         | 307                        |
| Exon 2                                | E: 5'-GGTAGCACCCCTAGAAAAAGAATGT-3'<br>R: 5'-GGGCAAAGGTCAGTTTCAAGTTGAG-3' | 60                         | 327                        |
| Exon 3                                | E: 5'-GTCIGTCTGCTGAGTGAAGGCTA-3'<br>R: 5'-GGTTCCTGGGTCCTGTGTACTTG-3'     | 60                         | 379                        |
| Exon 4                                | E: 5'-CCAACCAAGACTGCTGTGATTGIGTG-3'<br>R: 5'-GTTGGGTTGCCGAGGCAGTG-3'     | 60                         | 370                        |
| Exon 5                                | E: 5'-GAGGTGCCGAGTCATTGTTCCAG-3'<br>R: 5'-GGCAGGCCTTGTGAGAAGTTGTG-3'     | 60                         | 312                        |
| Exon 6                                | E: 5'-ACATCGTGTGGAACTGCTC-3'<br>R: 5'-CAGTTATTTTACCACATTAATTTG-3'        | 55                         | 285                        |
| Exon 7                                | E: 5'-CCTCTCCTTATCCCAGGAGCTGL-3'<br>R: 5'-GTTGGCCACTGAGGGTCTGA-3'        | 60                         | 300                        |
| Exon 8                                | E: 5'-CCACTATAACCACAGCCCTTTTATC-3'<br>R: 5'-CTCTGCACATCCATGGCCTTATC-3'   | 60                         | 312                        |
| Exon 9                                | E: 5'-CTCTTGTCTGTTGAGTTGGGCATC-3'<br>R: 5'-CCGGTCAGGTCAGTGGCTTTTC-3'     | 60                         | 230                        |

### Polymorphism in intron 7

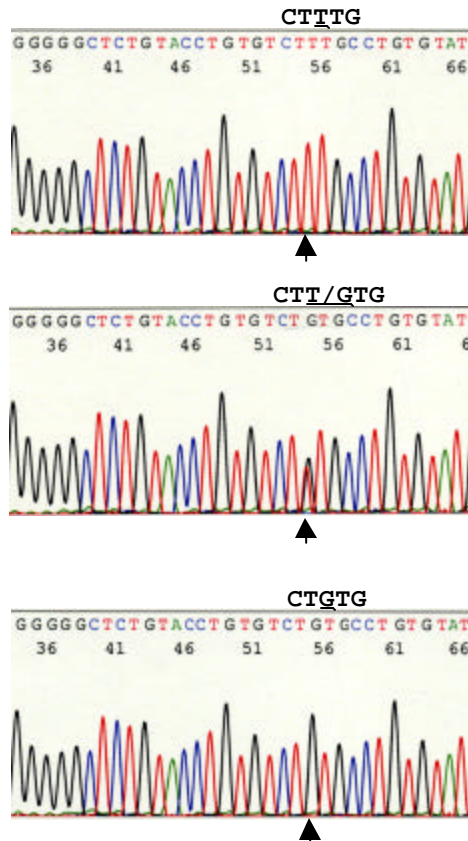

**Figure 2**

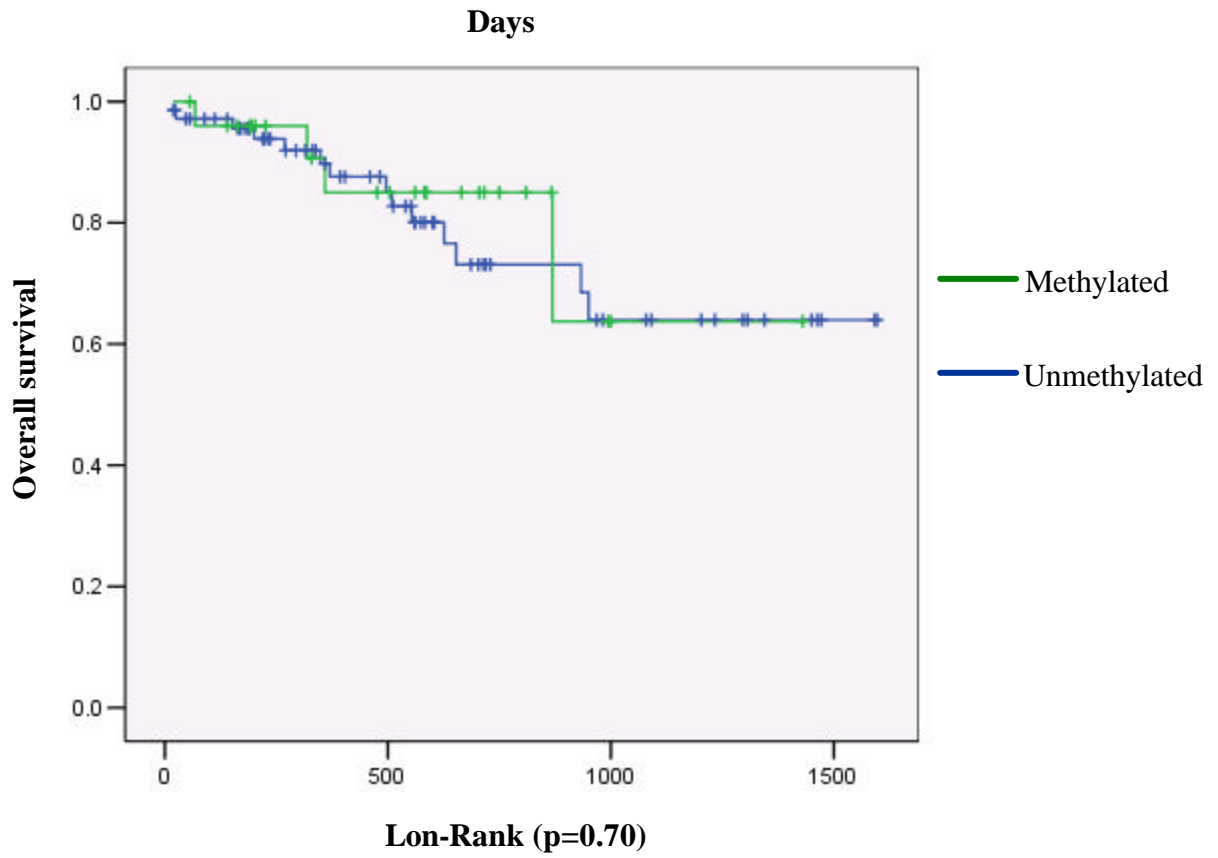

Overall survival in 98 ovarian cancers with or without TCF2 methylation.
